# Supplementary material for: Multiple runoff processes and multiple thresholds control agricultural runoff generation
Source: Copernicus journal article supplement (doi:10.5194/hess-20-4525-2016), 2016-11-11
Supplement: Supplementary file 1 [file hess-20-4525-2016-supplement.pdf]

Supplement of Hydrol. Earth Syst. Sci., 20, 4525–4545, 2016  
<http://www.hydrol-earth-syst-sci.net/20/4525/2016/>  
doi:10.5194/hess-20-4525-2016-supplement  
© Author(s) 2016. CC Attribution 3.0 License.

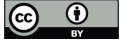

*Supplement of*

## **Multiple runoff processes and multiple thresholds control agricultural runoff generation**

**Shabnam Saffarpour et al.**

*Correspondence to:* Andrew Western (a.western@unimelb.edu.au)

The copyright of individual parts of the supplement might differ from the CC-BY 3.0 licence.

# Multiple runoff processes and multiple thresholds control agricultural runoff generation

Shabnam Saffarpour, Andrew W. Western, Russell Adams, and Jeffrey J. McDonnell

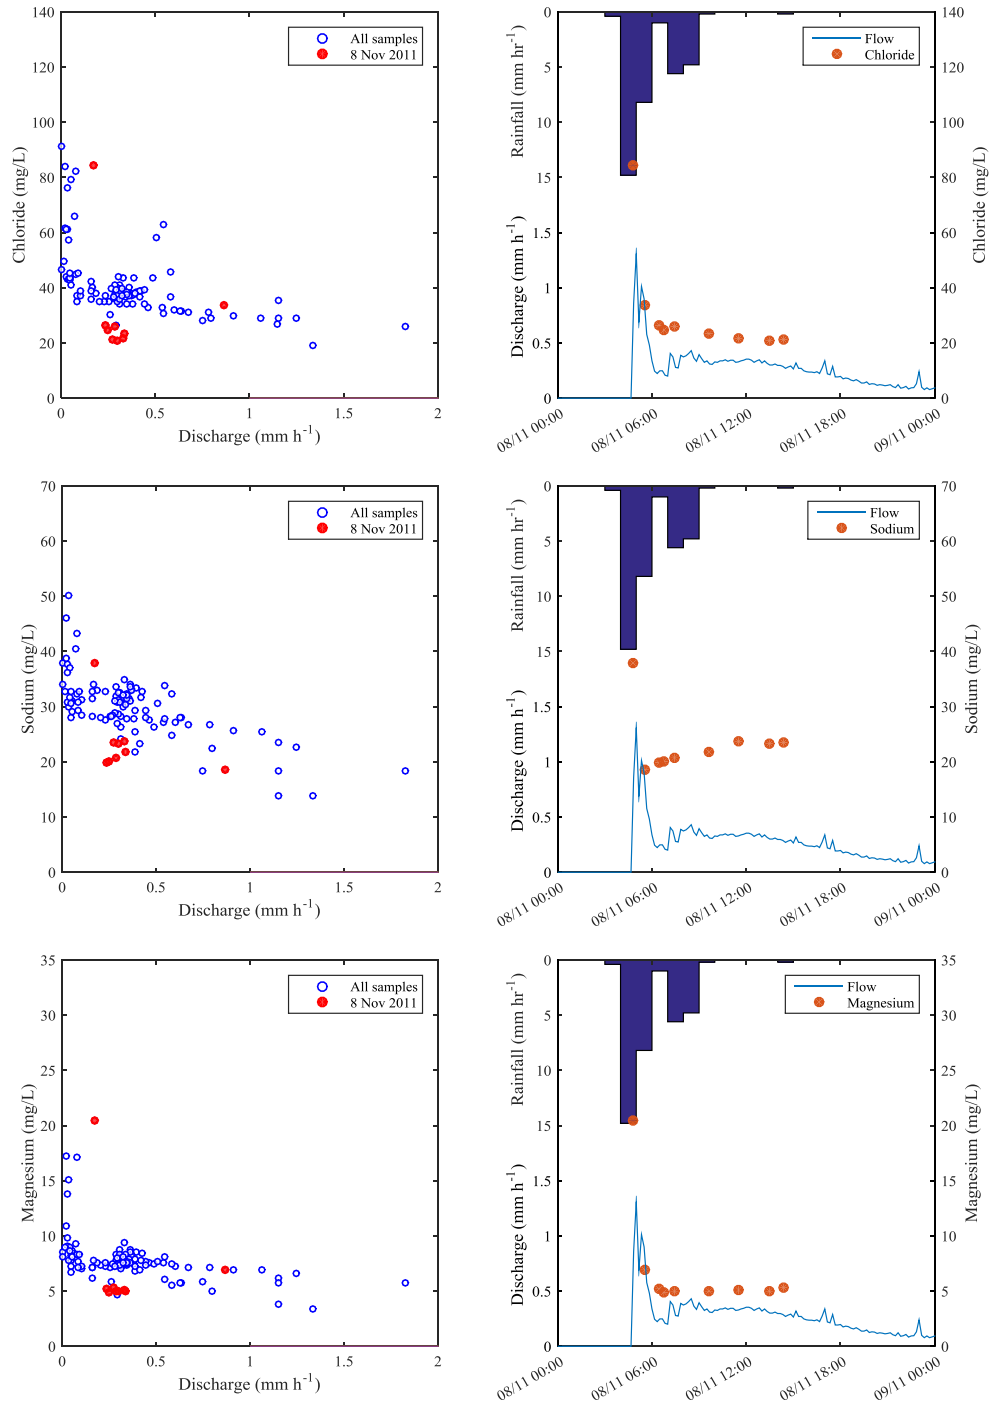

Figure S1: a) Discharge versus major ion concentration for all sampled events. The red colour identifies samples from event on 8/11/11, and b) Time series of rainfall, runoff and concentration for the event on 8/11/11

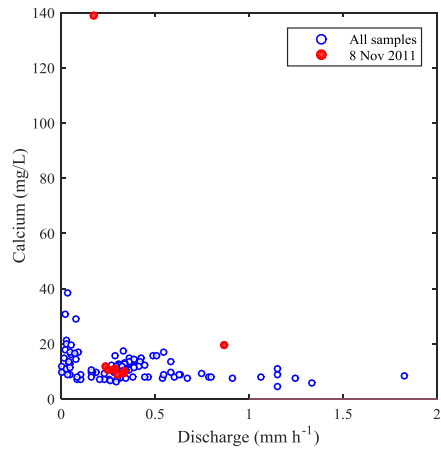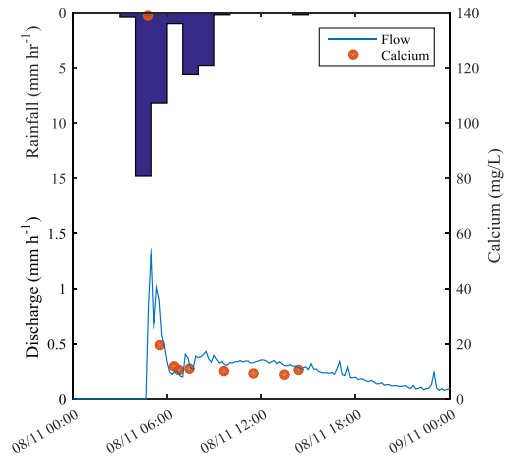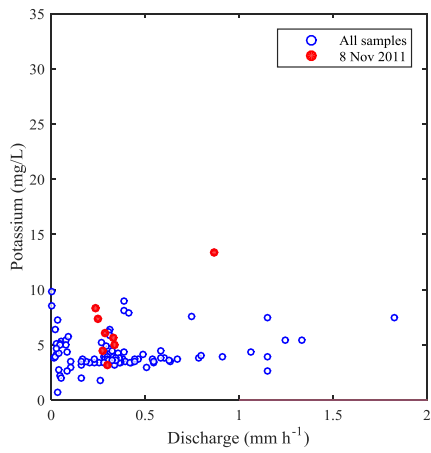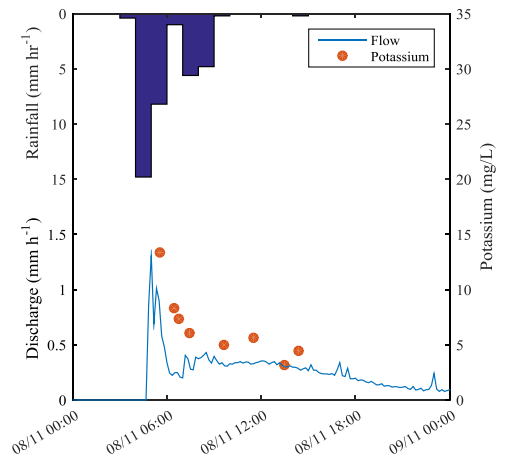

Figure S1 cont: a) Discharge versus major ion concentration for all sampled events. The red colour identifies samples from event on 8/11/11, and b) Time series of rainfall, runoff and concentration for the event on 8/11/11
